# Supplementary material for: CD56-negative NK cells with impaired effector function expand in CMV and EBV co-infected healthy donors with age
Source: publisher site journal article supplement (doi:10.18632/aging.101774), 2019-01-27
Supplement: Supplementary file [file aging-v11i2-101774-supplementary-material-SD1.pdf]

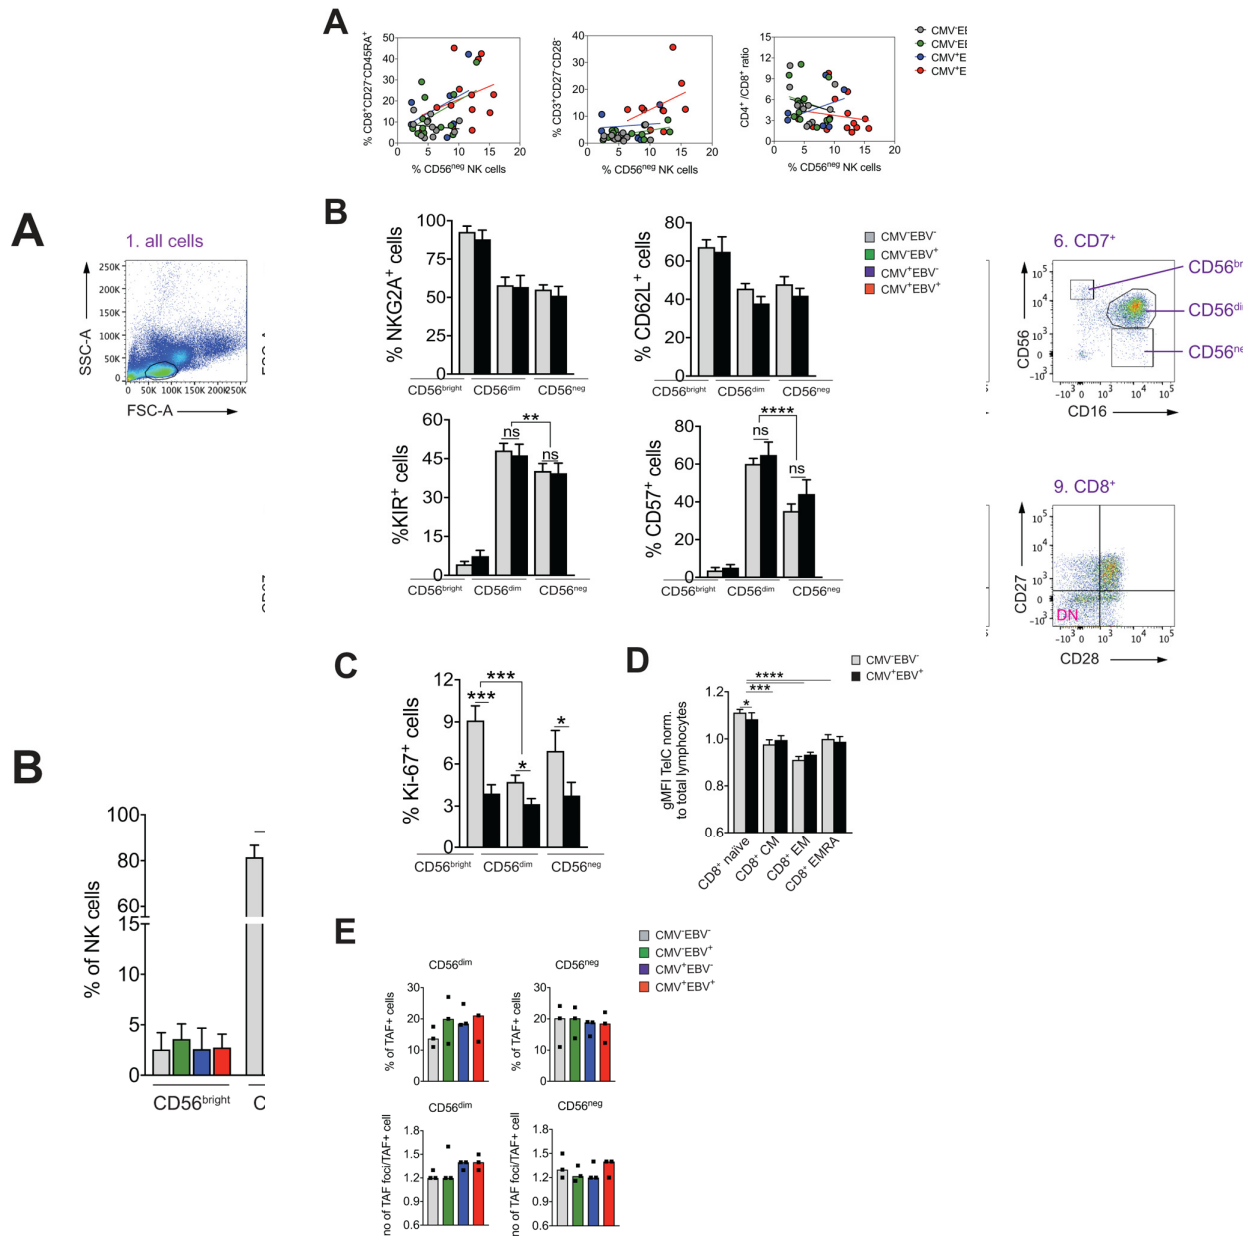

**Figure S1. Experimental gating strategy for NK and T cell subsets and frequencies of NK cell subsets within cohort subgroups.** (A) For all FACS experiments performed on total PBMCs, the following gating strategy was applied: (1) Lymphocytes were identified by sideward (SSC) and forward scatter (FSC) parameters. (2) Doublet discrimination gating was performed by plotting FSC-area (FSC-A) versus FSC-height (FSC-H) and excluding cells with disproportionate cell size as indicated. (3) Dead cells were excluded by staining with a fixable viability dye. Only living cells were used for further analysis. For analysis of NK cells, we first excluded T cells by gating on CD3<sup>-</sup> lymphocytes only (4), followed by exclusion of CD7<sup>-</sup> cells (5). These cells were then used to define CD56<sup>bright</sup>, CD56<sup>dim</sup> and CD56<sup>neg</sup> NK cells, as indicated in (6) T cells were identified by gating on CD3<sup>+</sup>, CD56<sup>-</sup> cells (4) followed by CD4 and CD8 gating (7). CD4<sup>+</sup> and CD8<sup>+</sup> T cells were further divided into naïve (N), central memory (CM), effector memory (EM) and terminally-differentiated effector memory (EMRA) subsets, based on their expression of CD27 and CD45RA (8 and 10). Double-negative (DN) CD4<sup>+</sup> and CD8<sup>+</sup> T cells were determined by CD27 and CD28 gating (9 and 11). (B) Frequencies of CD56<sup>bright</sup>, CD56<sup>dim</sup> and CD56<sup>neg</sup> NK cells – as determined by FACS analysis in total PBMCs – are shown in a cohort of HDs >60 years of age stratified as CMV<sup>-</sup>EBV<sup>-</sup> (n=11/11), CMV<sup>-</sup>EBV<sup>+</sup> (n=21/24), CMV<sup>+</sup>EBV<sup>-</sup> (n=6/6), and CMV<sup>+</sup>EBV<sup>+</sup> (n=12/14). \* p<0.05, \*\* p<0.005, \*\*\* p<0.005, \*\*\*\* p<0.0005.
